# Supplementary material
Source: Springer Nature journal article supplement (https://www.springermedizin.de/resource/supplementary/12875_2003_46_MOESM4_ESM.pdf/9436168)
Supplement: MOESM4 [file 9436168]

Additional file 4: Analysis by dose for particular statins

Atorvastatin

Total cholesterol

| Trials with   |              |                 | Patients on atorvastatin |                           |           | Weighted mean change |          |         |
|---------------|--------------|-----------------|--------------------------|---------------------------|-----------|----------------------|----------|---------|
| Baseline data | Outcome data | Daily dose (mg) | Randomised               | Analysed for outcome data | Duration  | Baseline             | Absolute | Percent |
| 5             | 5            | All combined    | 1334                     | 1334                      | 12/52 wks | 7.2                  | -2.0     | -27     |
| 4             | 4            | 10              | 1107                     | 1107                      | 12/52 wks | 7.2                  | -2.0     | -27     |
| 1             | 1            | 10/20           | 227                      | 227                       | 52 wks    | 7.2                  | -2.0     | -28     |

LDL

| Trials with   |              |                 | Patients on atorvastatin |          |           | Weighted mean change |          |         |
|---------------|--------------|-----------------|--------------------------|----------|-----------|----------------------|----------|---------|
| Baseline data | Outcome data | Daily dose (mg) | Randomised               | Analysed | Duration  | Baseline             | Absolute | Percent |
| 5             | 5            | All combined    | 1334                     | 1334     | 12/52 wks | 5.0                  | -1.8     | -36     |
| 4             | 4            | 10              | 1107                     | 1107     | 12/52 wks | 5.0                  | -1.8     | -37     |
| 1             | 1            | 10/20           | 227                      | 227      | 52 wks    | 5.0                  | -1.8     | -35     |

HDL

| Trials with   |              |                 | Patients on atorvastatin |          |           | Weighted mean change |          |         |
|---------------|--------------|-----------------|--------------------------|----------|-----------|----------------------|----------|---------|
| Baseline data | Outcome data | Daily dose (mg) | Randomised               | Analysed | Duration  | Baseline             | Absolute | Percent |
| 5             | 5            | All combined    | 1334                     | 1334     | 12/52 wks | 1.3                  | 0.1      | 7       |
| 4             | 4            | 10              | 1107                     | 1107     | 12/52 wks | 1.3                  | 0.1      | 7       |
| 1             | 1            | 10/20           | 227                      | 227      | 52 wks    | 1.3                  | 0.1      | 7       |

Triglycerides

| Trials with   |              |                 | Patients on atorvastatin |          |           | Weighted mean change |          |         |
|---------------|--------------|-----------------|--------------------------|----------|-----------|----------------------|----------|---------|
| Baseline data | Outcome data | Daily dose (mg) | Randomised               | Analysed | Duration  | Baseline             | Absolute | Percent |
| 5             | 5            | All combined    | 1334                     | 1334     | 12/52 wks | 2.0                  | -0.3     | -17     |
| 4             | 4            | 10              | 1107                     | 1107     | 12/52 wks | 2.0                  | -0.3     | -17     |
| 1             | 1            | 10/20           | 227                      | 227      | 52 wks    | 1.9                  | -0.3     | -17     |

Note: Randomised: Number of patients randomised in trials which provided baseline cholesterol or triglycerides

Cerivastatin

Total cholesterol

| Trials with   |              | Patients on cerivastatin |            |                           |          | Weighted mean change |          |         |
|---------------|--------------|--------------------------|------------|---------------------------|----------|----------------------|----------|---------|
| Baseline data | Outcome data | Daily dose (mg)          | Randomised | Analysed for outcome data | Duration | Baseline             | Absolute | Percent |
| 4             | 4            | All combined             | 2316       | 2316                      | 12-52    | 7.4                  | -1.6     | -22     |
| 1             | 1            | 0.025                    | 193        | 193                       | 12       | 7.7                  | -0.7     | -9      |
| 1             | 1            | 0.05                     | 187        | 187                       | 12       | 7.6                  | -0.9     | -12     |
| 1             | 1            | 0.1                      | 190        | 190                       | 12       | 7.6                  | -1.3     | -18     |
| 2             | 2            | 0.2                      | 353        | 353                       | 12-24    | 7.3                  | -1.5     | -21     |
| 0             | 0            | 0.3                      | no data    | no data                   |          |                      |          |         |
| 2             | 2            | 0.4                      | 527        | 527                       | 24-52    | 7.0                  | -1.7     | -25     |
| 1             | 1            | 0.8                      | 776        | 776                       | 52       | 7.1                  | -2.1     | -29     |
| 1             | 1            | 0.05-0.3                 | 260        | 260                       | 32       | 8.1                  | -1.3     | -16     |

LDL

| Trials with   |              | Patients on cerivastatin |            |                           |          | Weighted mean change |          |         |
|---------------|--------------|--------------------------|------------|---------------------------|----------|----------------------|----------|---------|
| Baseline data | Outcome data | Daily dose (mg)          | Randomised | Analysed for outcome data | Duration | Baseline             | Absolute | Percent |
| 5             | 5            | All combined             | 2828       | 2828                      | 12-52    | 5.2                  | -1.4     | -26     |
| 1             | 1            | 0.025                    | 193        | 193                       | 12       | 5.6                  | -0.7     | -12     |
| 1             | 1            | 0.05                     | 187        | 187                       | 12       | 5.6                  | -0.9     | -16     |
| 2             | 2            | 0.1                      | 356        | 356                       | 12/16    | 5.4                  | -1.1     | -20     |
| 3             | 3            | 0.2                      | 524        | 524                       | 12-24    | 5.1                  | -1.4     | -28     |
| 1             | 1            | 0.3                      | 175        | 175                       | 16       | 5.2                  | -1.3     | -24     |
| 2             | 2            | 0.4                      | 527        | 527                       | 24-52    | 4.8                  | -1.7     | -36     |
| 1             | 1            | 0.8                      | 776        | 776                       | 52       | 5.0                  | -1.6     | -33     |
| 1             | 1            | 0.05-0.3                 | 260        | 260                       | 32       | 6.0                  | -1.4     | -23     |

HDL

| Trials with   |              | Patients on cerivastatin |            |                           |          | Weighted mean change |          |         |
|---------------|--------------|--------------------------|------------|---------------------------|----------|----------------------|----------|---------|
| Baseline data | Outcome data | Daily dose (mg)          | Randomised | Analysed for outcome data | Duration | Baseline             | Absolute | Percent |
| 4             | 4            | All combined             | 2316       | 2316                      | 12-52    | 1.3                  | 0.1      | 7       |
| 1             | 1            | 0.025                    | 193        | 193                       | 12       | 1.3                  | 0.003    | 0.2     |
| 1             | 1            | 0.05                     | 187        | 187                       | 12       | 1.4                  | 0.02     | 1       |
| 1             | 1            | 0.1                      | 190        | 190                       | 12       | 1.3                  | 0.1      | 4       |
| 2             | 2            | 0.2                      | 353        | 353                       | 12-24    | 1.4                  | 0.04     | 5       |
| 1             | 1            | 0.3                      | no data    |                           |          |                      |          |         |
| 2             | 2            | 0.4                      | 527        | 527                       | 24-52    | 1.3                  | 0.1      | 8       |
| 1             | 1            | 0.8                      | 776        | 776                       | 52       | 1.2                  | 0.1      | 10      |
| 1             | 1            | 0.05-0.3                 | 260        | 260                       | 32       | 1.2                  | 0.1      | 9       |

triglycerides

| Trials with   |              | Patients on cerivastatin |            |                           |          | Weighted mean change |          |         |
|---------------|--------------|--------------------------|------------|---------------------------|----------|----------------------|----------|---------|
| Baseline data | Outcome data | Daily dose (mg)          | Randomised | Analysed for outcome data | Duration | Baseline             | Absolute | Percent |
| 5             | 5            | All combined             | 2998       | 2998                      | 12-52    | 2.1                  | -0.3     | -13     |
| 1             | 1            | 0.025                    | 193        | 193                       | 12       | 1.6                  | -0.03    | -0.2    |
| 1             | 1            | 0.05                     | 187        | 187                       | 12       | 1.5                  | -0.1     | -6      |
| 2             | 2            | 0.1                      | 356        | 190                       | 12/16    | 2.3                  | -0.3     | -13     |
| 3             | 3            | 0.2                      | 524        | 524                       | 12-24    | 2.1                  | -0.2     | -11     |
| 1             | 1            | 0.3                      | 175        | 175                       | 16       | 3.1                  | -0.4     | -12     |
| 2             | 2            | 0.4                      | 527        | 527                       | 24-52    | 1.9                  | -0.2     | -12     |
| 1             | 1            | 0.8                      | 776        | 776                       | 52       | 2.1                  | -0.4     | -18     |
| 1             | 1            | 0.05-0.3                 | 260        | 260                       | 32       | 2.0                  | -0.2     | -9      |

Note: Randomised: Number of patients randomised in trials which provided baseline cholesterol or triglycerides

## Fluvastatin

### Total cholesterol

| Trials with   |              |                 | Patients on fluvastatin |                           |                | Weighted mean change |          |         |
|---------------|--------------|-----------------|-------------------------|---------------------------|----------------|----------------------|----------|---------|
| Baseline data | Outcome data | Daily dose (mg) | Randomised              | Analysed for outcome data | Duration (wks) | Baseline             | Absolute | Percent |
| 9             | 9            | All combined    | 1209                    | 1209                      | 12-52          | 7.5                  | -1.6     | -21     |
| 5             | 5            | 40              | 376                     | 376                       | 12-24          | 7.6                  | -1.3     | -17     |
| 1             | 1            | 80              | 175                     | 175                       | 24             | 7.3                  | -1.8     | -24     |
| 1             | 1            | 10-20           | 237                     | 237                       | 18             | 6.0                  | -1.8     | -27     |
| 1             | 1            | 20-40           | 100                     | 100                       | 18             | 8.4                  | -1.8     | -22     |
| 2             | 2            | 40-80           | 321                     | 321                       | 16/52          | 7.5                  | -1.4     | -19     |

### LDL

| Trials with   |              |                 | Patients on fluvastatin |                           |                | Weighted mean change |          |         |
|---------------|--------------|-----------------|-------------------------|---------------------------|----------------|----------------------|----------|---------|
| Baseline data | Outcome data | Daily dose (mg) | Randomised              | Analysed for outcome data | Duration (wks) | Baseline             | Absolute | Percent |
| 9             | 8            | All combined    | 1209                    | 1022                      | 12-52          | 5.3                  | -1.6     | -30     |
| 5             | 5            | 40              | 376                     | 376                       | 12-24          | 5.4                  | -1.3     | -24     |
| 1             | 1            | 80              | 175                     | 175                       | 24             | 5.2                  | -1.8     | -34     |
| 1             | 1            | 10-20           | 237                     | 237                       | 18             | 4.7                  | -1.7     | -36     |
| 1             | 1            | 20-40           | 100                     | 100                       | 18             | 6.4                  | -1.8     | -28     |
| 2             | 2            | 40-80           | 321                     | 134                       | 16/52          | 5.6                  | -1.7     | -30     |

### HDL

| Trials with   |              |                 | Patients on fluvastatin |                           |                | Weighted mean change |          |         |
|---------------|--------------|-----------------|-------------------------|---------------------------|----------------|----------------------|----------|---------|
| Baseline data | Outcome data | Daily dose (mg) | Randomised              | Analysed for outcome data | Duration (wks) | Baseline             | Absolute | Percent |
| 9             | 8            | All combined    | 1209                    | 1022                      | 12-52          | 1.3                  | 0.1      | 7       |
| 5             | 5            | 40              | 376                     | 376                       | 12-24          | 1.3                  | 0.1      | 6       |
| 1             | 1            | 80              | 175                     | 175                       | 24             | 1.3                  | 0.1      | 8       |
| 1             | 1            | 10-20           | 237                     | 237                       | 18             | 1.2                  | 0.1      | 10      |
| 1             | 1            | 20-40           | 100                     | 100                       | 18             | 1.3                  | 0.1      | 4       |
| 2             | 2            | 40-80           | 321                     | 134                       | 16/52          | 1.4                  | 0.1      | 8       |

### Triglycerides

| Trials with   |              |                 | Patients on fluvastatin |                           |                | Weighted mean change |          |         |
|---------------|--------------|-----------------|-------------------------|---------------------------|----------------|----------------------|----------|---------|
| Baseline data | Outcome data | Daily dose (mg) | Randomised              | Analysed for outcome data | Duration (wks) | Baseline             | Absolute | Percent |
| 9             | 8            | All combined    | 1209                    | 1022                      | 12-52          | 1.9                  | -0.2     | -10     |
| 4             | 4            | 40              | 376                     | 376                       | 12-24          | 2.0                  | -0.1     | -6      |
| 1             | 1            | 80              | 175                     | 175                       | 24             | 1.9                  | -0.3     | -14     |
| 1             | 1            | 10-20           | 237                     | 237                       | 18             | 2.0                  | -0.2     | -11     |
| 1             | 1            | 20-40           | 100                     | 100                       | 18             | 1.5                  | -0.2     | -11     |
| 2             | 2            | 40-80           | 321                     | 134                       | 16/52          | 2.0                  | -0.3     | -15     |

Note: Randomised: Number of patients randomised in trials which provided baseline cholesterol or triglycerides

## Lovastatin

### Total cholesterol

| Trials with   |              |                 | Patients on lovastatin |                           |                | Weighted mean change |          |         |
|---------------|--------------|-----------------|------------------------|---------------------------|----------------|----------------------|----------|---------|
| Baseline data | Outcome data | Daily dose (mg) | Randomised             | Analysed for outcome data | Duration (wks) | Baseline             | Absolute | Percent |
| 13            | 13           | All combined    | 8561                   | 8394                      | 12 wks - 2 yrs | 6.9                  | -1.2     | -17     |
| 3             | 3            | 20              | 1967                   | 1967                      | 16-48 wks      | 6.7                  | -1.2     | -17     |
| 4             | 4            | 40              | 3743                   | 3743                      | 12-48 wks      | 6.8                  | -1.5     | -23     |
| 3             | 3            | 80              | 1870                   | 1870                      | 14 wks - 2 yrs | 6.8                  | -2.0     | -29     |
| 1             | 1            | 10-60           | 24                     | 24                        | 18 wks         | 7.8                  | -2.5     | -32     |
| 4             | 3            | 20-40           | 149                    | 96                        | 12-18 wks      | 7.3                  | -1.5     | -21     |
| 3             | 3            | 20-80           | 653                    | 653                       | 18 wks - 2 yrs | 7.3                  | -1.2     | -17     |
| 2             | 2            | 40-80           | 156                    | 156                       | 12 wks         | 10.0                 | -3.2     | -32     |

### LDL

| Trials with   |              |                 | Patients on lovastatin |                           |                | Weighted mean change |          |         |
|---------------|--------------|-----------------|------------------------|---------------------------|----------------|----------------------|----------|---------|
| Baseline data | Outcome data | Daily dose (mg) | Randomised             | Analysed for outcome data | Duration (wks) | Baseline             | Absolute | Percent |
| 13            | 13           | All combined    | 8561                   | 8561                      | 12 wks - 2 yrs | 4.8                  | -1.5     | -30     |
| 3             | 3            | 20              | 1967                   | 1967                      | 16-48 wks      | 4.7                  | -1.1     | -24     |
| 4             | 4            | 40              | 3743                   | 3743                      | 12-48 wks      | 4.8                  | -1.4     | -30     |
| 3             | 3            | 80              | 1870                   | 1870                      | 14 wks - 2 yrs | 4.8                  | -1.6     | -34     |
| 1             | 1            | 10-60           | 24                     | 24                        | 18 wks         | 5.8                  | -2.6     | -45     |
| 4             | 4            | 20-40           | 149                    | 149                       | 12-18 wks      | 5.3                  | -1.6     | -31     |
| 3             | 3            | 20-80           | 653                    | 653                       | 18 wks - 2 yrs | 5.2                  | -1.9     | -36     |
| 2             | 2            | 40-80           | 156                    | 156                       | 12 wks         | 7.5                  | -3.0     | -40     |

### HDL

| Trials with   |              |                 | Patients on lovastatin |                           |                | Weighted mean change |          |         |
|---------------|--------------|-----------------|------------------------|---------------------------|----------------|----------------------|----------|---------|
| Baseline data | Outcome data | Daily dose (mg) | Randomised             | Analysed for outcome data | Duration (wks) | Baseline             | Absolute | Percent |
| 13            | 13           | All combined    | 8561                   | 8561                      | 12 wks - 2 yrs | 1.2                  | 0.1      | 7       |
| 3             | 3            | 20              | 1967                   | 1967                      | 16-48 wks      | 1.2                  | 0.1      | 6       |
| 4             | 4            | 40              | 3743                   | 3743                      | 12-48 wks      | 1.2                  | 0.1      | 8       |
| 3             | 3            | 80              | 1870                   | 1870                      | 14 wks - 2 yrs | 1.2                  | 0.1      | 9       |
| 1             | 1            | 10-60           | 24                     | 24                        | 18 wks         | 1.3                  | 0.2      | 15      |
| 4             | 4            | 20-40           | 149                    | 149                       | 12-18 wks      | 1.2                  | 0.1      | 9       |
| 3             | 3            | 20-80           | 653                    | 653                       | 18 wks - 2 yrs | 1.2                  | -0.1     | -8      |
| 2             | 2            | 40-80           | 156                    | 156                       | 12 wks         | 1.2                  | 0.1      | 8       |

### Triglycerides

| Trials with   |              |                 | Patients on lovastatin |                           |                | Weighted mean change |          |         |
|---------------|--------------|-----------------|------------------------|---------------------------|----------------|----------------------|----------|---------|
| Baseline data | Outcome data | Daily dose (mg) | Randomised             | Analysed for outcome data | Duration (wks) | Baseline             | Absolute | Percent |
| 13            | 13           | All combined    | 8561                   | 8561                      | 12 wks - 2 yrs | 1.8                  | -0.3     | -15     |
| 3             | 3            | 20              | 1967                   | 1967                      | 16-48 wks      | 1.8                  | -0.2     | -11     |
| 4             | 4            | 40              | 3743                   | 3743                      | 12-48 wks      | 1.8                  | -0.3     | -15     |
| 3             | 3            | 80              | 1870                   | 1870                      | 14 wks - 2 yrs | 1.7                  | -0.3     | -19     |
| 1             | 1            | 10-60           | 24                     | 24                        | 18 wks         | 1.8                  | -0.5     | -25     |
| 3             | 3            | 20-40           | 105                    | 105                       | 12-18 wks      | 1.9                  | -0.3     | -14     |
| 3             | 3            | 20-80           | 653                    | 653                       | 18 wks - 2 yrs | 1.9                  | -0.3     | -17     |
| 2             | 2            | 40-80           | 156                    | 156                       | 12 wks         | 1.9                  | -0.3     | -15     |

Note: Randomised: Number of patients randomised in trials which provided baseline cholesterol or triglycerides

## Pravastatin

### Total cholesterol

| Trials with   |              |                 | Patients on pravastatin |                           |                | Weighted mean change |          |         |
|---------------|--------------|-----------------|-------------------------|---------------------------|----------------|----------------------|----------|---------|
| Baseline data | Outcome data | Daily dose (mg) | Randomised              | Analysed for outcome data | Duration (wks) | Baseline             | Absolute | Percent |
| 44            | 42           | All combined    | 11811                   | 9730                      | 12 wks - 5 yrs | 6.6                  | -1.3     | -20     |
| 4             | 4            | 10              | 258                     | 258                       | 12-24 wks      | 7.1                  | -1.3     | -18     |
| 1             | 1            | 15              | 48                      | 48                        | 52 wks         | 7.3                  | -1.6     | -25     |
| 9             | 9            | 20              | 889                     | 889                       | 12-52 wks      | 7.2                  | -1.5     | -20     |
| 17            | 16           | 40              | 8716                    | 6635                      | 12 wks - 5 yrs | 6.5                  | -1.3     | -21     |
| 2             | 2            | 10-20           | 154                     | 154                       | 26/52 wks      | 6.6                  | -0.9     | -14     |
| 6             | 6            | 10-40           | 705                     | 705                       | 16-24 wks      | 7.6                  | -1.3     | -18     |
| 6             | 6            | 20-40           | 972                     | 972                       | 12 wks - 3 yrs | 7.0                  | -1.3     | -19     |
| 1             | 1            | 40-80           | 68                      | 68                        | 16 wks         | 8.0                  | -1.7     | -21     |

### LDL

| Trials with   |              |                 | Patients on pravastatin |                           |                | Weighted mean change |          |         |
|---------------|--------------|-----------------|-------------------------|---------------------------|----------------|----------------------|----------|---------|
| Baseline data | Outcome data | Daily dose (mg) | Randomised              | Analysed for outcome data | Duration (wks) | Baseline             | Absolute | Percent |
| 44            | 44           | All combined    | 11811                   | 11811                     | 12 wks - 5 yrs | 4.5                  | -1.2     | -27     |
| 4             | 4            | 10              | 258                     | 258                       | 12-24 wks      | 5.0                  | -1.0     | -19     |
| 1             | 1            | 15              | 48                      | 48                        | 52 wks         | 5.3                  | -1.6     | -30     |
| 9             | 9            | 20              | 889                     | 889                       | 12-52 wks      | 5.0                  | -1.4     | -27     |
| 17            | 17           | 40              | 8716                    | 8716                      | 12 wks - 5 yrs | 4.4                  | -1.2     | -28     |
| 2             | 2            | 10-20           | 154                     | 154                       | 26/52 wks      | 4.6                  | -1.0     | -22     |
| 6             | 6            | 10-40           | 705                     | 705                       | 16-24 wks      | 5.6                  | -1.3     | -25     |
| 6             | 6            | 20-40           | 972                     | 972                       | 12 wks - 3 yrs | 4.9                  | -1.3     | -26     |
| 1             | 1            | 40-80           | 68                      | 68                        | 16 wks         | 5.6                  | -1.7     | -30     |

### HDL

| Trials with   |              |                 | Patients on pravastatin |                           |                | Weighted mean change |          |         |
|---------------|--------------|-----------------|-------------------------|---------------------------|----------------|----------------------|----------|---------|
| Baseline data | Outcome data | Daily dose (mg) | Randomised              | Analysed for outcome data | Duration (wks) | Baseline             | Absolute | Percent |
| 44            | 43           | All combined    | 11811                   | 9730                      | 12 wks - 5 yrs | 1.1                  | 0.1      | 12      |
| 4             | 4            | 10              | 258                     | 258                       | 12-24 wks      | 1.3                  | 0.1      | 7       |
| 1             | 1            | 15              | 48                      | 48                        | 52 wks         | 1.2                  | 0.1      | 9       |
| 9             | 9            | 20              | 889                     | 889                       | 12-52 wks      | 1.2                  | 0.1      | 6       |
| 18            | 17           | 40              | 9730                    | 7649                      | 12 wks - 5 yrs | 1.1                  | 0.2      | 14      |
| 2             | 2            | 10-20           | 154                     | 154                       | 26/52 wks      | 1.2                  | 0.1      | 9       |
| 6             | 6            | 10-40           | 705                     | 705                       | 16-24 wks      | 1.3                  | 0.2      | 17      |
| 6             | 6            | 20-40           | 972                     | 972                       | 12 wks - 3 yrs | 1.2                  | 0.1      | 8       |
| 1             | 1            | 40-80           | 68                      | 68                        | 16 wks         | 1.4                  | 0.1      | 9       |

### Triglycerides

| Trials with   |              |                 | Patients on pravastatin |                           |                | Weighted mean change |          |         |
|---------------|--------------|-----------------|-------------------------|---------------------------|----------------|----------------------|----------|---------|
| Baseline data | Outcome data | Daily dose (mg) | Randomised              | Analysed for outcome data | Duration (wks) | Baseline             | Absolute | Percent |
| 44            | 42           | All combined    | 11811                   | 9730                      | 12 wks - 5 yrs | 1.8                  | -0.2     | -12     |
| 4             | 4            | 10              | 258                     | 258                       | 12-24 wks      | 1.5                  | 0.0      | -7      |
| 1             | 1            | 15              | 48                      | 48                        | 52 wks         | 1.7                  | -0.2     | -11     |
| 9             | 9            | 20              | 889                     | 889                       | 12-52 wks      | 1.9                  | -0.2     | -12     |
| 18            | 17           | 40              | 9730                    | 7649                      | 12 wks - 5 yrs | 1.8                  | -0.2     | -12     |
| 2             | 2            | 10-20           | 154                     | 154                       | 26/52 wks      | 1.9                  | -0.1     | -4      |
| 6             | 6            | 10-40           | 705                     | 705                       | 16-24 wks      | 1.6                  | -0.3     | -22     |
| 6             | 6            | 20-40           | 972                     | 972                       | 12 wks - 3 yrs | 1.8                  | -0.2     | -14     |
| 1             | 1            | 40-80           | 68                      | 68                        | 16 wks         | 1.5                  | -0.2     | -15     |

Note: Randomised: Number of patients randomised in trials which provided baseline cholesterol or triglycerides

## Rosuvastatin

### Total cholesterol

| Trials with   |              | Patients on rosuvastatin |            |                           |                | Weighted mean change |          |         |
|---------------|--------------|--------------------------|------------|---------------------------|----------------|----------------------|----------|---------|
| Baseline data | Outcome data | Daily dose (mg)          | Randomised | Analysed for outcome data | Duration (wks) | Baseline             | Absolute | Percent |
| 4             | 4            | All combined             | 1005       | 1005                      | 12             | 7.2                  | -2.2     | -31     |
| 4             | 4            | 5                        | 510        | 510                       | 12             | 7.3                  | -2.2     | -30     |
| 4             | 4            | 10                       | 495        | 495                       | 12             | 7.0                  | -2.3     | -33     |

### LDL

| Trials with   |              | Patients on rosuvastatin |            |                           |                | Weighted mean change |          |         |
|---------------|--------------|--------------------------|------------|---------------------------|----------------|----------------------|----------|---------|
| Baseline data | Outcome data | Daily dose (mg)          | Randomised | Analysed for outcome data | Duration (wks) | Baseline             | Absolute | Percent |
| 4             | 4            | All combined             | 1005       | 1005                      | 12             | 4.8                  | -2.2     | -46     |
| 4             | 4            | 5                        | 510        | 510                       | 12             | 4.8                  | -2.1     | -44     |
| 4             | 4            | 10                       | 495        | 495                       | 12             | 4.8                  | -2.3     | -49     |

### HDL

| Trials with   |              | Patients on rosuvastatin |            |                           |                | Weighted mean change |          |         |
|---------------|--------------|--------------------------|------------|---------------------------|----------------|----------------------|----------|---------|
| Baseline data | Outcome data | Daily dose (mg)          | Randomised | Analysed for outcome data | Duration (wks) | Baseline             | Absolute | Percent |
| 4             | 4            | All combined             | 1005       | 1005                      | 12             | 1.0                  | 0.1      | 9       |
| 4             | 4            | 5                        | 510        | 510                       | 12             | 1.0                  | 0.1      | 8       |
| 4             | 4            | 10                       | 495        | 495                       | 12             | 1.0                  | 0.1      | 9       |

### Triglycerides

| Trials with   |              | Patients on rosuvastatin |            |                           |                | Weighted mean change |          |         |
|---------------|--------------|--------------------------|------------|---------------------------|----------------|----------------------|----------|---------|
| Baseline data | Outcome data | Daily dose (mg)          | Randomised | Analysed for outcome data | Duration (wks) | Baseline             | Absolute | Percent |
| 4             | 4            | All combined             | 1005       | 1005                      | 12             | 2.0                  | -0.4     | -18     |
| 4             | 4            | 5                        | 510        | 510                       | 12             | 2.0                  | -0.3     | -16     |
| 4             | 4            | 10                       | 495        | 495                       | 12             | 2.5                  | -0.4     | -19     |

Note: Randomised: Number of patients randomised in trials which provided baseline cholesterol or triglycerides

Simvastatin

Total cholesterol

| Trials with   |              |                 | Patients on simvastatin |                           |                  | Weighted mean change |          |         |
|---------------|--------------|-----------------|-------------------------|---------------------------|------------------|----------------------|----------|---------|
| Baseline data | Outcome data | Daily dose (mg) | Randomised              | Analysed for outcome data | Duration (wks)   | Baseline             | Absolute | Percent |
| 31            | 31           | All combined    | 17168                   | 17168                     | 12 wks - 5 yrs   | 6.1                  | -1.6     | -25     |
| 1             | 1            | 2.5             | 60                      | 60                        | 12 wks           | 7.1                  | -0.9     | -13     |
| 1             | 1            | 5               | 60                      | 60                        | 12 wks           | 7.3                  | -1.3     | -18     |
| 2             | 2            | 10              | 126                     | 126                       | 24/52 wks        | 5.7                  | -1.6     | -29     |
| 11            | 11           | 20              | 1313                    | 1313                      | 12 wks - 4 yrs   | 6.5                  | -1.4     | -21     |
| 4             | 4            | 40              | 10952                   | 10952                     | 24 wks - 3.5 yrs | 5.7                  | -1.5     | -26     |
| 1             | 1            | 80              | 669                     | 669                       | 24 wks           | 7.9                  | -2.8     | -35     |
| 2             | 2            | 5-10            | 211                     | 211                       | 12 wks           | 6.9                  | -0.7     | -11     |
| 1             | 1            | 5-40            | 127                     | 127                       | 32 wks           | 7.9                  | -1.8     | -23     |
| 4             | 4            | 10-20           | 392                     | 392                       | 12/52 wks        | 7.4                  | -1.3     | -18     |
| 7             | 7            | 10-40           | 852                     | 852                       | 18 wks - 2 yrs   | 7.3                  | -1.6     | -22     |
| 3             | 3            | 20-40           | 2406                    | 2406                      | 16 wks - 5 yrs   | 6.5                  | -1.6     | -25     |

LDL

| Trials with   |              |                 | Patients on simvastatin |                           |                  | Weighted mean change |          |         |
|---------------|--------------|-----------------|-------------------------|---------------------------|------------------|----------------------|----------|---------|
| Baseline data | Outcome data | Daily dose (mg) | Randomised              | Analysed for outcome data | Duration (wks)   | Baseline             | Absolute | Percent |
| 31            | 31           | All combined    | 17168                   | 17168                     | 12 wks - 5 yrs   | 4.0                  | -1.4     | -34     |
| 1             | 1            | 2.5             | 60                      | 60                        | 12 wks           | 4.9                  | -0.9     | -18     |
| 1             | 1            | 5               | 60                      | 60                        | 12 wks           | 5.2                  | -1.3     | -26     |
| 2             | 2            | 10              | 126                     | 126                       | 24/52 wks        | 5.2                  | -1.0     | -19     |
| 11            | 11           | 20              | 1313                    | 1313                      | 12 wks - 4 yrs   | 4.8                  | -1.8     | -37     |
| 4             | 4            | 40              | 10952                   | 10952                     | 24 wks - 3.5 yrs | 3.4                  | -1.2     | -34     |
| 1             | 1            | 80              | 669                     | 669                       | 24 wks           | 5.8                  | -2.7     | -47     |
| 2             | 2            | 5-10            | 211                     | 211                       | 12 wks           | 4.9                  | -1.1     | -22     |
| 1             | 1            | 5-40            | 127                     | 127                       | 32 wks           | 5.7                  | -1.8     | -32     |
| 4             | 4            | 10-20           | 392                     | 392                       | 12/52 wks        | 5.4                  | -1.6     | -30     |
| 7             | 7            | 10-40           | 852                     | 852                       | 18 wks - 2 yrs   | 5.2                  | -1.6     | -30     |
| 3             | 3            | 20-40           | 2406                    | 2406                      | 16 wks - 5 yrs   | 4.9                  | -1.7     | -35     |

HDL

| Trials with   |              |                 | Patients on simvastatin |                           |                  | Weighted mean change |          |         |
|---------------|--------------|-----------------|-------------------------|---------------------------|------------------|----------------------|----------|---------|
| Baseline data | Outcome data | Daily dose (mg) | Randomised              | Analysed for outcome data | Duration (wks)   | Baseline             | Absolute | Percent |
| 31            | 30           | All combined    | 17168                   | 16938                     | 12 wks - 5 yrs   | 1.1                  | 0.1      | 6       |
| 1             | 1            | 2.5             | 60                      | 60                        | 12 wks           | 1.3                  | 0.1      | 8       |
| 1             | 1            | 5               | 60                      | 60                        | 12 wks           | 1.4                  | 0.1      | 4       |
| 2             | 2            | 10              | 126                     | 126                       | 24/52 wks        | 1.3                  | 0.1      | 5       |
| 11            | 11           | 20              | 1313                    | 1313                      | 12 wks - 4 yrs   | 1.2                  | 0.1      | 8       |
| 4             | 4            | 40              | 10952                   | 10952                     | 24 wks - 3.5 yrs | 1.1                  | 0.0      | 4       |
| 1             | 1            | 80              | 669                     | 669                       | 24 wks           | 1.3                  | 0.1      | 8       |
| 2             | 2            | 5-10            | 211                     | 211                       | 12 wks           | 1.3                  | 0.1      | 10      |
| 1             | 1            | 5-40            | 127                     | 127                       | 32 wks           | 1.3                  | 0.1      | 11      |
| 4             | 4            | 10-20           | 392                     | 392                       | 12/52 wks        | 1.1                  | 0.1      | 12      |
| 7             | 7            | 10-40           | 852                     | 852                       | 18 wks - 2 yrs   | 1.2                  | 0.2      | 11      |
| 3             | 3            | 20-40           | 2406                    | 2406                      | 16 wks - 5 yrs   | 1.2                  | 0.1      | 8       |

Triglycerides

| Trials with   |              |                 | Patients on simvastatin |                           |                  | Weighted mean change |          |         |
|---------------|--------------|-----------------|-------------------------|---------------------------|------------------|----------------------|----------|---------|
| Baseline data | Outcome data | Daily dose (mg) | Randomised              | Analysed for outcome data | Duration (wks)   | Baseline             | Absolute | Percent |
| 30            | 30           | All combined    | 17039                   | 17039                     | 12 wks - 5 yrs   | 2.0                  | -0.4     | -17     |
| 1             | 1            | 2.5             | 60                      | 60                        | 12 wks           | 1.9                  | -0.1     | -5      |
| 1             | 1            | 5               | 60                      | 60                        | 12 wks           | 1.7                  | -0.1     | -3      |
| 2             | 2            | 10              | 126                     | 126                       | 24/52 wks        | 1.5                  | -0.2     | -12     |
| 11            | 11           | 20              | 1313                    | 1313                      | 12 wks - 4 yrs   | 1.9                  | -0.3     | -17     |
| 4             | 4            | 40              | 10952                   | 10952                     | 24 wks - 3.5 yrs | 2.2                  | -0.4     | -18     |
| 1             | 1            | 80              | 669                     | 669                       | 24 wks           | 1.8                  | -0.4     | -24     |
| 2             | 2            | 5-10            | 211                     | 211                       | 12 wks           | 1.7                  | -0.1     | -9      |
| 1             | 1            | 5-40            | 127                     | 127                       | 32 wks           | 1.2                  | -0.1     | -10     |
| 4             | 4            | 10-20           | 392                     | 392                       | 12/52 wks        | 1.9                  | -0.3     | -14     |
| 7             | 7            | 10-40           | 852                     | 852                       | 18 wks - 2 yrs   | 1.8                  | -0.4     | -22     |
| 2             | 2            | 20-40           | 2277                    | 2277                      | 16 wks - 5 yrs   | 1.5                  | -0.2     | -10     |

Note: Randomised: Number of patients randomised in trials which provided baseline cholesterol or triglycerides
